# Supplementary material for: Tissue Expression Pattern of PMK-2 p38 MAPK Is Established by the miR-58 Family in C. elegans
Source: PubMed Central journal article supplement (PMC4335502; doi:10.1371/journal.pgen.1004997), 2015-02-11

**A**

GAAGAGCCAATGAAAATATGAagtcaaatgtgttcaagtgctaaaaat**atctca**aaactgtggaattttctttttctatattgtatctccctaaactatttat  
 ttcactaaaaatcaaatttgtgtccctaattcct**tgatctct**aattatccaacaat**cgatctc**agatgttcttttccacaaaa**atctca**atfttttcttttgaa  
 accatagacttgtgatttaccttaactttctcgttaatcctataagttgccatgacctcagagcctcttttaatttattattcatttagattcatttatcaaa  
 ttgaagtgtataaagaattaatgtaaatattcaattttctaaatactcttaaacatttaatcggttcaaattgccgcttaatttttatatttacatttatatt  
 ggttttacgtacacaaaaaaatcatatftttttcaaaataattacttcaaactcttacaacatgattccaggtaacgggagccaATGTTTCCACAGACAACAAT

**B**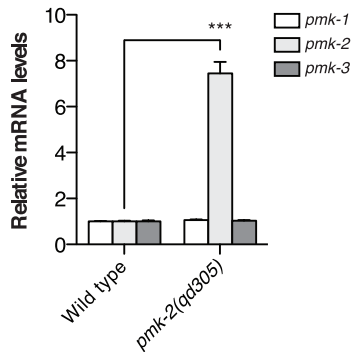**C**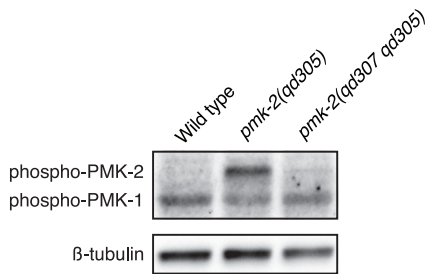

Supplement: pgen.1004997.s001.pdf [file pgen.1004997.s001.pdf]
