# Supplementary material for: Tissue Expression Pattern of PMK-2 p38 MAPK Is Established by the miR-58 Family in C. elegans
Source: PubMed Central journal article supplement (PMC4335502; doi:10.1371/journal.pgen.1004997), 2015-02-11

Wild type

mir-80; mir-58; mir-81-82

mir-80; mir-58 pmk-2(qd284); mir-81-82

phospho-PMK-2  
phospho-PMK-1

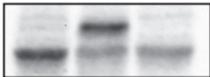

$\beta$ -tubulin

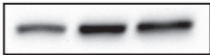

Supplement: pgen.1004997.s002.pdf [file pgen.1004997.s002.pdf]
