# Supplementary material for: Tissue Expression Pattern of PMK-2 p38 MAPK Is Established by the miR-58 Family in C. elegans
Source: PubMed Central journal article supplement (PMC4335502; doi:10.1371/journal.pgen.1004997), 2015-02-11
Supplement: pgen.1004997.s003.pdf [file pgen.1004997.s003.pdf]

| <b>Strain</b> | <b>Genotype</b>                                                                                                                            |
|---------------|--------------------------------------------------------------------------------------------------------------------------------------------|
| AU78          | <i>agIs219 III</i>                                                                                                                         |
| ZD395         | <i>agIs219 III; sek-1(km4) X</i>                                                                                                           |
| ZD39          | <i>agIs219 III; pmk-1(km25) IV</i>                                                                                                         |
| ZD1050        | <i>agIs219 III; pmk-2(qd284) IV</i>                                                                                                        |
| ZD1053        | <i>agIs219 III; pmk-2(qd287) IV</i>                                                                                                        |
| ZD983         | <i>agIs219 III; pmk-2(qd279 qd171) pmk-1(km25) IV</i>                                                                                      |
| ZD1080        | <i>agIs219 III; pmk-2(qd280 qd171) pmk-1(km25) IV</i>                                                                                      |
| ZD832         | <i>kyIs140 I</i>                                                                                                                           |
| ZD896         | <i>kyIs140 I; sek-1(km4) X</i>                                                                                                             |
| ZD881         | <i>kyIs140 I; pmk-1(km25) IV</i>                                                                                                           |
| ZD1055        | <i>kyIs140 I; pmk-2(qd284) IV</i>                                                                                                          |
| ZD1054        | <i>kyIs140 I; pmk-2(qd287) IV</i>                                                                                                          |
| ZD949         | <i>kyIs140 I; pmk-2(qd279 qd171) pmk-1(km25) IV</i>                                                                                        |
| ZD1007        | <i>kyIs140 I; pmk-2(qd280 qd171) pmk-1(km25) IV</i>                                                                                        |
| ZD827         | <i>nIs145 X</i>                                                                                                                            |
| ZD1079        | <i>tir-1(qd4) III; nIs145 X</i>                                                                                                            |
| ZD874         | <i>pmk-1(km25) IV; nIs145 X</i>                                                                                                            |
| ZD1051        | <i>pmk-2(qd284) IV; nIs145 X</i>                                                                                                           |
| ZD1056        | <i>pmk-2(qd287) IV; nIs145 X</i>                                                                                                           |
| ZD985         | <i>pmk-2(qd279 qd171) pmk-1(km25) IV; nIs145 X</i>                                                                                         |
| ZD1057        | <i>pmk-2(qd280 qd171) pmk-1(km25) IV; nIs145 X</i>                                                                                         |
| ZD1195        | <i>qdEx101[P<sub>operon</sub>::islo-1::pmk-3::pmk-2::GFP::pmk-1::mCherry]</i>                                                              |
| ZD721         | <i>agIs219 III; pmk-2(qd171) pmk-1(km25) IV</i>                                                                                            |
| N2            | wild type                                                                                                                                  |
| ZD1221        | <i>pmk-2(qd305) IV</i>                                                                                                                     |
| ZD1226        | <i>pmk-2(qd307 qd305) IV</i>                                                                                                               |
| MT17453       | <i>mir-58(n4640) IV</i>                                                                                                                    |
| MT13949       | <i>mir-80(nDf53) III</i>                                                                                                                   |
| MT13954       | <i>mir-81-82(nDf54) X</i>                                                                                                                  |
| MT18409       | <i>mir-80(nDf53) III; mir-58(n4640) IV</i>                                                                                                 |
| MT18410       | <i>mir-58(n4640) IV; mir-81-82(nDf54) X</i>                                                                                                |
| MT14128       | <i>mir-80(nDf53) III; mir-81-82(nDf54) X</i>                                                                                               |
| MT15563       | <i>mir-80(nDf53) III; mir-58(n4640) IV; mir-81-82(nDf54) X</i>                                                                             |
| ZD1196        | <i>qdEx102[P<sub>operon</sub>::islo-1::pmk-3::pmk-2<sub>mut</sub>::GFP::pmk-1::mCherry]</i>                                                |
| ZD1199        | <i>mir-80(nDf53) III; mir-58(n4640) IV; mir-81-82(nDf54) X;<br/>qdEx101[P<sub>operon</sub>::islo-1::pmk-3::pmk-2::GFP::pmk-1::mCherry]</i> |
| ZD1205        | <i>mir-80(nDf53) III; mir-58(n4640) pmk-2(qd284) IV; mir-81-82(nDf54) X</i>                                                                |
